# Supplementary material for: The Conserved miR-51 microRNA Family Is Redundantly Required for Embryonic Development and Pharynx Attachment in Caenorhabditis elegans
Source: Oxford University Press journal article supplement (doi:10.1534/genetics.110.117515), 2010-04-27
Supplement: 117515_si.pdf [file 117515_si.pdf]

# GENETICS

Supporting Information

<http://www.genetics.org/cgi/content/full/genetics.110.117515/DC1>

**The Conserved miR-51 microRNA Family Is Redundantly Required  
for Embryonic Development and Pharynx Attachment  
in *Caenorhabditis elegans***

W. Robert Shaw, Javier Armisen, Nicolas J. Lehrbach and Eric A. Miska

Copyright © 2010 by the Genetics Society of America  
DOI: 10.1534/genetics.110.117515

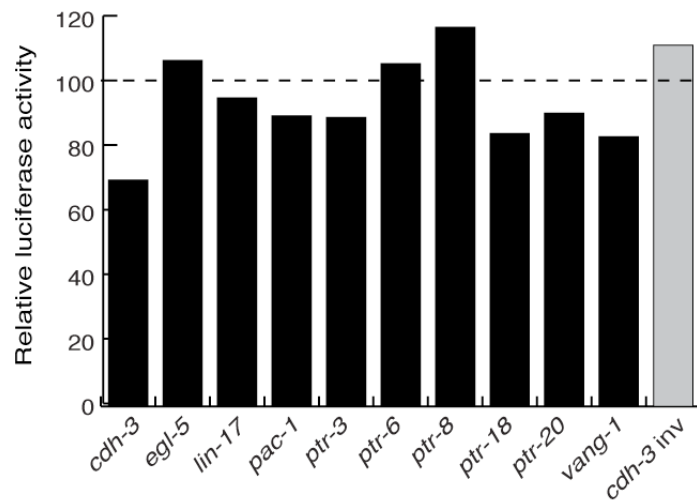

FIGURE S1.—miR-52 can regulate the *cdh-3* 3'UTR in mammalian cells. Luciferase reporter assay. Full length 3'UTRs of predicted miR-51 family target genes were cloned into a modified psiCHECK-2 dual luciferase assay vector (Promega) and transfected into HeLa cells (see Materials and Methods). Luciferase activity shown is relative to transfection of a miR-52 mimic as compared to a control miRNA mimic. Experiments were done in triplicates. *cdh-3 inv*, antisense *cdh-3* 3'UTR.

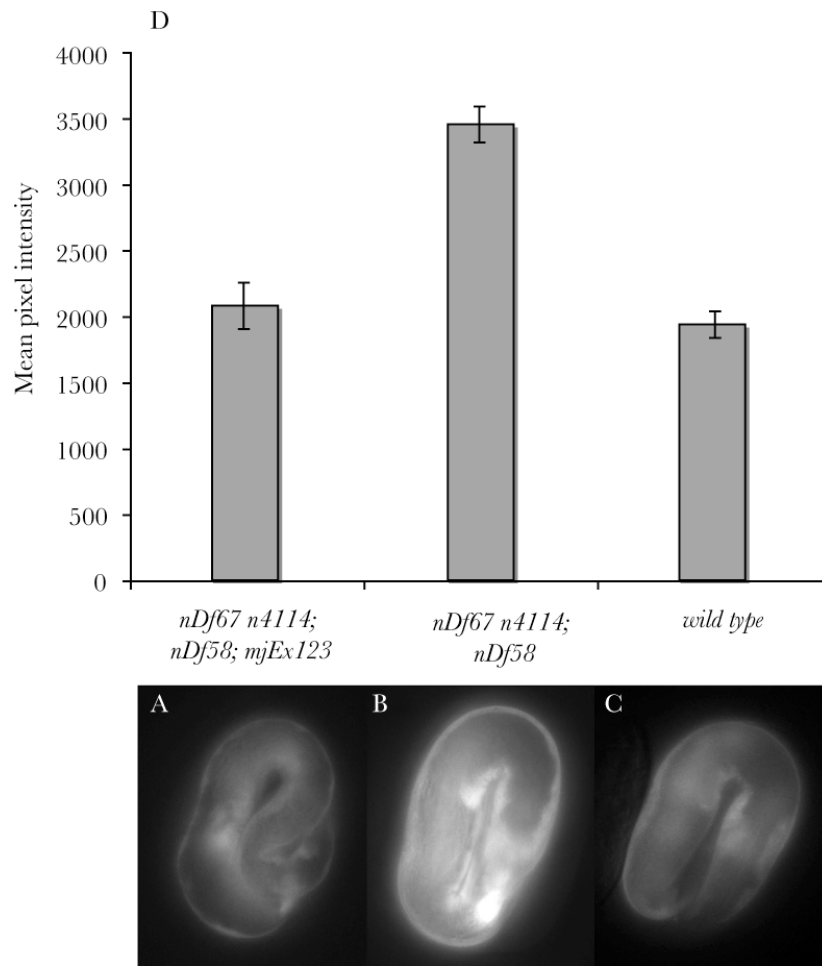

FIGURE S2.—Endogenous levels of miR-51 family miRNAs are able to regulate a sensor transgene containing *cdh-3* 3'UTR sequences. (A-C) GFP was expressed under the *col-10* promoter and the *cdh-3* wild-type 3'UTR. The transgene was expressed at a lower level in the presence of a miR-52-expressing rescue array (A) or in the wild-type background (C) than in the absence of any miR-51 family miRNAs (B). D) Quantification of mean pixel intensity in >30 animals. Bars represent the standard error of the mean.

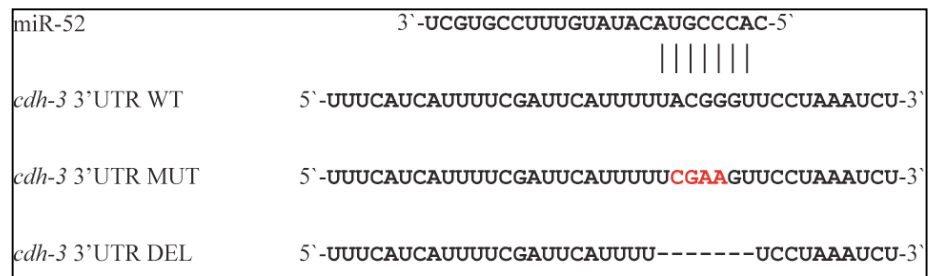

FIGURE S3.—Mutations introduced into the full-length 3'UTR of *cdh-3*. 40 base pairs of the 3'UTR of *cdh-3* encompassing the predicted miR-52 target site is shown. Mutations introduced into the 3'UTR should abolish either some (MUT) or all (DEL) base pairing between the miRNA seed and the 3'UTR.

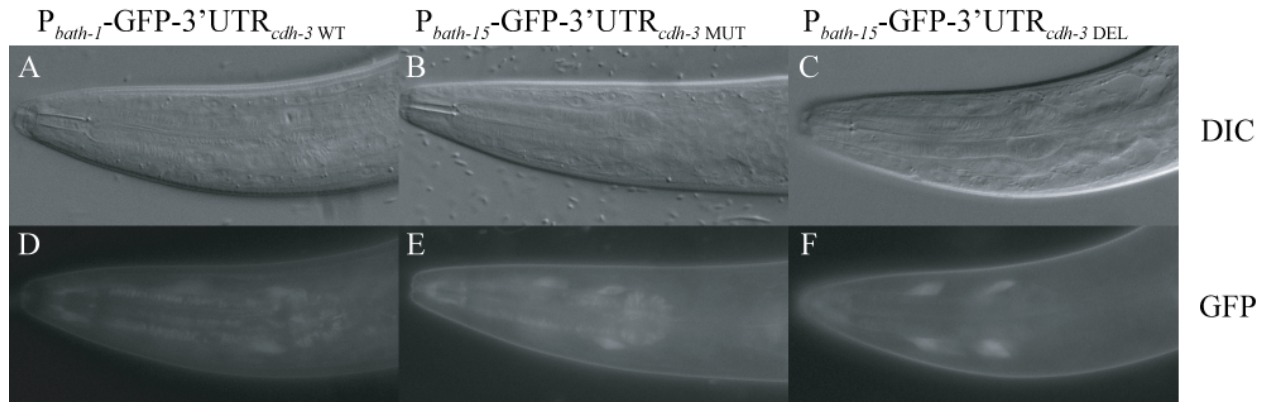

FIGURE S4.—Regulation of GFP::CDH-3 levels in the arcade cells requires the miR-51 family binding site. GFP was expressed under the *bath-15* promoter in the arcade cells (D-F) and compared between constructs with a *cdh-3* 3'UTR that was either wild-type (WT) (A,D), MUT (B,E) or DEL (C-F). For molecular identities of *cdh-3* 3'UTR mutations refer to Fig. S3. Larvae were imaged at the L4 stage.

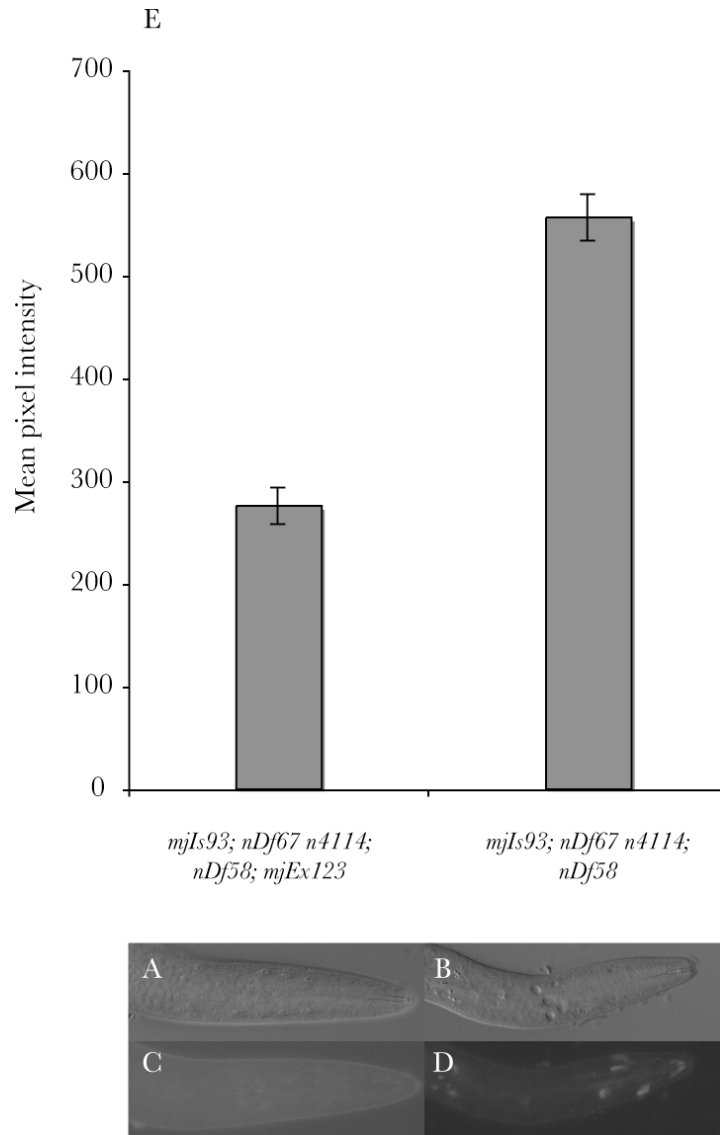

FIGURE S5.—An arcade driven reporter is upregulated in *mir-51* family mutants. (A-D) In a single copy transgene *mjIs93* GFP is expressed in the arcade cells under the *bath-15* promoter from the L1 stage. The majority of *mir-51* family mutant embryos are Pun and do not express this marker prior to their death (Fig. 2). A minority of *mir-51* family mutant embryos are not Pun (B) and do express this arcade marker. GFP under the control of the wild-type *cdh-3* 3'UTR is overexpressed in non-Pun *mir-51* family mutant embryos (D) as compared to non-Pun rescued embryos (C). (E) Mean pixel intensities of the visible arcade cell bodies were determined in 10 animals. Where arcade cell bodies were not visible, pixel intensity was measured between the mouth and the anterior pharyngeal bulb in a position consistent with the arcade cell body position (i.e. outside the pharyngeal basement membrane) at least 3 times per animal. Background fluorescence of the slide was subtracted. Error bars represent standard error of the mean.

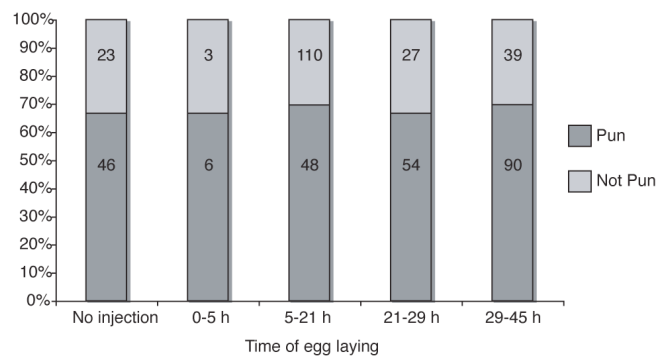

FIGURE S6.—Microinjection of dsRNA against *cdh-3* does not suppress the unattached pharynx (Pun) phenotype. Eight microinjected LA *nDf67 n4114; nDf58; mjEx123* animals were allowed to lay progeny for the indicated time periods. Progeny lacking the *mjEx123* rescuing transgene were identified through the lack of DLG-1::mCHERRY expression and were scored for a Pun phenotype 24 hrs later. No difference was observed in the frequency of Pun phenotype.

**TABLE S1**  
**Strains used in this study**

| Strain | Genotype                                                                                                                                                           |
|--------|--------------------------------------------------------------------------------------------------------------------------------------------------------------------|
| N2     | +                                                                                                                                                                  |
| SX511  | <i>mir-51(n4473) IV</i>                                                                                                                                            |
| SX512  | <i>mir-52(n4114) IV</i>                                                                                                                                            |
| SX510  | <i>mir-52(n4100) IV</i>                                                                                                                                            |
| SX513  | <i>mir-53(n4113) IV</i>                                                                                                                                            |
| SX514  | <i>mir-54 mir-55 mir-56(nDf58) X</i>                                                                                                                               |
| SX515  | <i>mir-51 mir-53(nDf67) IV</i>                                                                                                                                     |
| SX138  | <i>mir-51(n4473) mir-52(n4114) IV</i>                                                                                                                              |
| SX16   | <i>mir-53(n4113) mir-52(n4100) IV</i>                                                                                                                              |
| SX516  | <i>mir-53(n4113) mir-52(n4114) IV</i>                                                                                                                              |
| SX517  | <i>mir-51 mir-53(nDf67) mir-52 (n4114) IV</i>                                                                                                                      |
| SX48   | <i>mir-51(n4473) IV; mir-54 mir-55 mir-56(nDf58) X</i>                                                                                                             |
| SX96   | <i>mir-52(n4114) IV; mir-54 mir-55 mir-56(nDf58) X</i>                                                                                                             |
| SX27   | <i>mir-53(n4113) IV; mir-54 mir-55 mir-56(nDf58) X</i>                                                                                                             |
| SX625  | <i>mir-51 mir-53(nDf67) IV; mir-54 mir-55 mir-56(nDf58) X</i>                                                                                                      |
| SX111  | <i>mir-53(n4113) mir-52(n4100) IV; mir-54 mir-55 mir-56(nDf58) X</i>                                                                                               |
| SX173  | <i>mir-51(n4473) mir-52(n4114) / mir-51 (n4473) <i>unc-26(e205) dpy-4(e1166) IV; mir-54 mir-55 mir-56 (nDf58) X</i></i>                                            |
| SX947  | <i>mir-51(n4473) mir-52(n4114) IV; mir-54 mir-55 mir-56(nDf58) X; mjEx123 (miR-52 rescue)</i><br>[miR-52 rescue contains <i>P<sub>alg-1</sub>::DLG-1-MCHERRY</i> ] |
| SX123  | <i>mir-51 mir-53(nDf67) mir-52(n4114) / mir-51 mir-53(nDf67) <i>unc-26(e205) dpy-4(e1166) IV; mir-54 mir-55 mir-56 (nDf58) X</i></i>                               |
| SX356  | <i>mir-51 mir-53(nDf67) mir-52(n4114) IV; mir-54 mir-55 mir-56(nDf58) X; mjEx123 (miR-52 rescue)</i>                                                               |
| MT1642 | <i>lin-15AB(n765ts) X</i>                                                                                                                                          |
| SX860  | <i>lin-15AB(n765ts) X; mjIs60 (P<sub>mir-51</sub>-GFP, <i>lin-15B(+)</i>)</i>                                                                                      |
| SX615  | <i>mjIs39 (P<sub>mir-52</sub>-GFP, <i>lin-15B(+)</i>)</i>                                                                                                          |
| SX509  | <i>mjIs37 (P<sub>mir-53</sub>-GFP, <i>lin-15B(+)</i>)</i>                                                                                                          |
| SX59   | <i>lin-15AB(n765ts) X; mjEx12 (P<sub>mir-54-56</sub>-GFP, <i>lin-15B(+)</i>)</i>                                                                                   |
| EG4322 | <i>ttT5605 II; unc-119(ed3)</i>                                                                                                                                    |
| SX1003 | <i>mjIs93 II (P<sub>bath-15</sub>-GFP-3'UTR<sub>cdh-3</sub> WT, <i>cbr-unc-119(+)</i>); <i>unc-119(ed3) III</i></i>                                                |
| SX1005 | <i>mjIs95 II (P<sub>bath-15</sub>-GFP-3'UTR<sub>cdh-3</sub> WT, <i>cbr-unc-119(+)</i>); <i>unc-119(ed3) III</i></i>                                                |
| SX1007 | <i>mjIs97 II (P<sub>bath-15</sub>-GFP-3'UTR<sub>cdh-3</sub> MUT, <i>cbr-unc-119(+)</i>); <i>unc-119(ed3) III</i></i>                                               |
| SX1008 | <i>mjIs98 II (P<sub>bath-15</sub>-GFP-3'UTR<sub>cdh-3</sub> DEL, <i>cbr-unc-119(+)</i>); <i>unc-119(ed3) III</i></i>                                               |
| SX1009 | <i>mjIs99 II (P<sub>bath-15</sub>-GFP-3'UTR<sub>cdh-3</sub> DEL, <i>cbr-unc-119(+)</i>); <i>unc-119(ed3) III</i></i>                                               |
| SX669  | <i>mir-51 mir-53(nDf67) mir-52(n4114); mir-54 mir-55 mir-56(nDf58) X; mjEx123 (miR-52 rescue); pxIs10 (P<sub>pha-4</sub>-GFP-PM, <i>rol-6(su1006)</i>)</i>         |



|        |                                                                                                                                                                                                                                         |
|--------|-----------------------------------------------------------------------------------------------------------------------------------------------------------------------------------------------------------------------------------------|
| SX1016 | <i>mir-51 mir-53(nDf67) mir-52(n4114); mir-54 mir-55 mir-56(nDf58) X; mjEx123</i> (miR-52 rescue); <i>mjEx288</i> (CDH-3(++))                                                                                                           |
| SX1017 | <i>mir-51 mir-53(nDf67) mir-52(n4114); mir-54 mir-55 mir-56(nDf58) X; mjEx123</i> (miR-52 rescue); <i>mjEx289</i> (CDH-3(++))                                                                                                           |
| SX1048 | <i>mjIs93 [P<sub>bath-15</sub>-GFP-3'UTR<sub>cdh-3</sub> WT, <i>unc-119(+)</i>] II ; mir-51 mir-53(nDf67) mir-52(n4114) IV; mir-54 mir-55 mir-56(nDf58) X ; mjEx123</i> (miR-52 rescue)                                                 |
| SX596  | <i>mir-51 mir-53(nDf67) mir-52(n4114); mir-54 mir-55 mir-56(nDf58) X; mjEx123</i> (miR-52 rescue); <i>mjEx177</i> (P <sub>col-10</sub> -GFP-3'UTR <sub>cdh-3</sub> WT, P <sub>myo-2</sub> -MCHERRY-3'UTR <sub>unc-54</sub> )            |
| SX597  | <i>mir-51 mir-53(nDf67) mir-52(n4114); mir-54 mir-55 mir-56(nDf58) X; mjEx123</i> (miR-52 rescue); <i>mjEx178</i> (P <sub>col-10</sub> -GFP-3'UTR <sub>cdh-3</sub> WT, P <sub>myo-2</sub> -MCHERRY-3'UTR <sub>unc-54</sub> )            |
| SX598  | <i>mir-51 mir-53(nDf67) mir-52(n4114); mir-54 mir-55 mir-56(nDf58) X; mjEx123</i> (miR-52 rescue); <i>mjEx179</i> (P <sub>col-10</sub> -GFP-3'UTR <sub>cdh-3</sub> WT, P <sub>myo-2</sub> -MCHERRY-3'UTR <sub>unc-54</sub> )            |
| SX689  | <i>mir-51 mir-53(nDf67) mir-52(n4114); mir-54 mir-55 mir-56(nDf58) X; mjEx123</i> (miR-52 rescue); <i>mjEx187</i> (P <sub>col-10</sub> -GFP-3'UTR <sub>cdh-3</sub> MUT, P <sub>myo-2</sub> -MCHERRY-3'UTR <sub>unc-54</sub> )           |
| SX690  | <i>mir-51 mir-53(nDf67) mir-52(n4114); mir-54 mir-55 mir-56(nDf58) X; mjEx123</i> (miR-52 rescue); <i>mjEx188</i> (P <sub>col-10</sub> -GFP-3'UTR <sub>cdh-3</sub> MUT, P <sub>myo-2</sub> -MCHERRY-3'UTR <sub>unc-54</sub> )           |
| SX691  | <i>mir-51 mir-53(nDf67) mir-52(n4114); mir-54 mir-55 mir-56(nDf58) X; mjEx123</i> (miR-52 rescue); <i>mjEx189</i> (P <sub>col-10</sub> -GFP-3'UTR <sub>cdh-3</sub> MUT, P <sub>myo-2</sub> -MCHERRY-3'UTR <sub>unc-54</sub> )           |
| SX692  | <i>mir-51 mir-53(nDf67) mir-52(n4114); mir-54 mir-55 mir-56(nDf58) X; mjEx123</i> (miR-52 rescue); <i>mjEx190</i> (P <sub>col-10</sub> -GFP-3'UTR <sub>cdh-3</sub> MUT, P <sub>myo-2</sub> -MCHERRY-3'UTR <sub>unc-54</sub> )           |
| SX693  | <i>mir-51 mir-53(nDf67) mir-52(n4114); mir-54 mir-55 mir-56(nDf58) X; mjEx123</i> (miR-52 rescue); <i>mjEx191</i> (P <sub>col-10</sub> -GFP-3'UTR <sub>cdh-3</sub> MUT, P <sub>myo-2</sub> -MCHERRY-3'UTR <sub>unc-54</sub> )           |
| SX1117 | <i>mir-51 mir-53(nDf67) mir-52(n4114); mir-54 mir-55 mir-56(nDf58) X; mjEx123</i> (miR-52 rescue); <i>mjEx298</i> (P <sub>pha-4</sub> - <i>mir-52-3'UTR<sub>unc-54</sub></i> , P <sub>pha-4</sub> -HIS-58-GFP-3'UTR <sub>unc-54</sub> ) |
| SX1118 | <i>mir-51 mir-53(nDf67) mir-52(n4114); mir-54 mir-55 mir-56(nDf58) X; mjEx123</i> (miR-52 rescue); <i>mjEx299</i> (P <sub>pha-4</sub> - <i>mir-52-3'UTR<sub>unc-54</sub></i> , P <sub>pha-4</sub> -HIS-58-GFP-3'UTR <sub>unc-54</sub> ) |
| SX1119 | <i>mir-51 mir-53(nDf67) mir-52(n4114); mir-54 mir-55 mir-56(nDf58) X; mjEx123</i> (miR-52 rescue); <i>mjEx300</i> (P <sub>pha-4</sub> - <i>mir-52-3'UTR<sub>unc-54</sub></i> , P <sub>pha-4</sub> -HIS-58-GFP-3'UTR <sub>unc-54</sub> ) |
| SX1120 | <i>mir-51 mir-53(nDf67) mir-52(n4114); mir-54 mir-55 mir-56(nDf58) X; mjEx123</i> (miR-52 rescue); <i>mjEx301</i> (P <sub>pha-4</sub> - <i>mir-52-3'UTR<sub>unc-54</sub></i> , P <sub>pha-4</sub> -HIS-58-GFP-3'UTR <sub>unc-54</sub> ) |
| SX1121 | <i>mir-51 mir-53(nDf67) mir-52(n4114); mir-54 mir-55 mir-56(nDf58) X; mjEx123</i> (miR-52 rescue); <i>mjEx302</i> (P <sub>pha-4</sub> - <i>mir-52-3'UTR<sub>unc-54</sub></i> , P <sub>pha-4</sub> -HIS-58-GFP-3'UTR <sub>unc-54</sub> ) |
| SX704  | <i>mir-51 mir-53(nDf67) mir-52(n4114); mir-54 mir-55 mir-56(nDf58) X; mjEx123</i> (miR-52 rescue); <i>mjEx301</i> (P <sub>pha-4</sub> -HIS-58-GFP-3'UTR <sub>unc-54</sub> )                                                             |
| SX1284 | <i>mjEx178</i> (P <sub>col-10</sub> -GFP-3'UTR <sub>cdh-3</sub> WT, P <sub>myo-2</sub> -MCHERRY-3'UTR <sub>unc-54</sub> )                                                                                                               |
| SX1285 | <i>mjEx179</i> (P <sub>col-10</sub> -GFP-3'UTR <sub>cdh-3</sub> WT, P <sub>myo-2</sub> -MCHERRY-3'UTR <sub>unc-54</sub> )                                                                                                               |

---

**TABLE S2****DNA constructs used in this study**

| Construct             | Vector      | Contents              | Cloning            | Size (bp) | Start    | End      | LG  | Strand | Template       |
|-----------------------|-------------|-----------------------|--------------------|-----------|----------|----------|-----|--------|----------------|
| miRNA reporters       |             |                       |                    |           |          |          |     |        |                |
| miR-51::GFP           | pPD95.79    | miR-51 promoter       | Sall/BamH1         | 1354      | 11026083 | 11027436 | IV  | -      | N2 genomic DNA |
| miR-52::GFP           | pPD95.79    | miR-52 promoter       | Sall/BamH1         | 2916      | 14031059 | 14033974 | IV  | +      | N2 genomic DNA |
| miR-53::GFP           | pPD95.79    | miR-53 promoter       | Sall/BamH1         | 767       | 11027662 | 11028428 | IV  | -      | N2 genomic DNA |
| miR-54-56::GFP        | pPD95.79    | miR-54-56 promoter    | Sall/HindIII       | 2889      | 13145016 | 13147904 | X   | -      | N2 genomic DNA |
| miRNA rescues         |             |                       |                    |           |          |          |     |        |                |
| miR-51 rescue         | TOPO pCR2.1 | miR-51 locus          | TA cloning         | 2011      | 11025613 | 11027623 | IV  | -      | N2 genomic DNA |
| miR-52 rescue         | TOPO pCR2.1 | miR-52 locus          | TA cloning         | 3337      | 14031848 | 14035184 | IV  | +      | N2 genomic DNA |
| miR-53 rescue         | TOPO pCR2.1 | miR-53 locus          | TA cloning         | 2211      | 11026342 | 11028552 | IV  | -      | N2 genomic DNA |
| miR-54-56 rescue      | TOPO pCR2.1 | miR-54-56 locus       | TA cloning         | 3697      | 13143492 | 13147188 | X   | -      | N2 genomic DNA |
| miR-52 (promoterless) |             | miR-52 locus fragment | MluI               | 172       | 14033952 | 14034123 | IV  | +      | N2 genomic DNA |
| Gateway® promoters    |             |                       |                    |           |          |          |     |        |                |
| Pbath-15              | pDONR P4P1R | bath-15 promoter      | Multisite Gateway® | 1126      | 7775944  | 7777069  | III | -      | N2 genomic DNA |
| Pcol-10               | pDONR P4P1R | col-10 promoter       | Multisite Gateway® | 1353      | 9165265  | 9166617  | V   | -      | N2 genomic DNA |
| Gateway® gene         |             |                       |                    |           |          |          |     |        |                |
| gfp                   | pDONR 221   | gfp                   | Multisite Gateway® | 1002      | 2        | 1003     |     |        | pPD95.75       |
| mir-52 (promoterless) | pDONR 221   | miR-52 locus          | Multisite Gateway® | 172       | 14033952 | 14034123 | IV  | +      | N2 genomic DNA |

## Gateway® 3'UTRs

|                    |                |                    |                       |      |         |         |     |   |                |
|--------------------|----------------|--------------------|-----------------------|------|---------|---------|-----|---|----------------|
| cdh-3 3'UTR WT     | pDONR<br>P2RP3 | cdh-3 3'UTR WT     | Multisite<br>Gateway® | 418  | 7740905 | 7741322 | III | - | WRM066aH<br>05 |
| cdh-3 3'UTR<br>MUT | pDONR<br>P2RP3 | cdh-3 3'UTR<br>MUT | Multisite<br>Gateway® | 419  | 7740905 | 7741323 | III | - | WRM066aH<br>05 |
| cdh-3 3'UTR DEL    | pDONR<br>P2RP3 | cdh-3 3'UTR<br>DEL | Multisite<br>Gateway® | 419  | 7740905 | 7741323 | III | - | WRM066aH<br>05 |
| unc-54 3'UTR       | pDONR<br>P2RP3 | unc-54 3'UTR       | Multisite<br>Gateway® | 1159 | 748     | 1906    |     |   | pPD95.75       |

Assembled  
constructs

|                                      |                            |                               |                                                                                                                                  |  |  |  |  |  |  |
|--------------------------------------|----------------------------|-------------------------------|----------------------------------------------------------------------------------------------------------------------------------|--|--|--|--|--|--|
| myo-2::<br>mcherry::unc-54<br>pGFP-N | pDEST R4-<br>R3<br>pJH4.52 | pha-4::HIS-58-<br>GFP::unc-54 | Multisite<br>Gateway®                                                                                                            |  |  |  |  |  |  |
| col-10::gfp::cdh-3<br>WT             | pDEST R4-<br>R3            |                               | Multisite<br>Gateway®                                                                                                            |  |  |  |  |  |  |
| col-10::gfp::cdh-3<br>MUT            | pDEST R4-<br>R3            |                               | Multisite<br>Gateway®                                                                                                            |  |  |  |  |  |  |
| bath-15::gfp::cdh-3<br>WT            | pDEST R4-<br>R3            |                               | Multisite<br>Gateway®                                                                                                            |  |  |  |  |  |  |
| bath-15::gfp::cdh-3<br>MUT           | pDEST R4-<br>R3            |                               | Multisite<br>Gateway®                                                                                                            |  |  |  |  |  |  |
| bath-15::gfp::cdh-3<br>DEL           | pDEST R4-<br>R3            |                               | Multisite<br>Gateway®                                                                                                            |  |  |  |  |  |  |
| pha-4::<br>mir-52::unc-54            | pJH4.52                    |                               | pGFP-N was<br>digested with<br>MluI and a<br>promoterless<br>mir-52<br>fragment was<br>inserted in<br>the correct<br>orientation |  |  |  |  |  |  |

## Luciferase assay

|        |                          |                |             |  |  |  |  |  |                          |
|--------|--------------------------|----------------|-------------|--|--|--|--|--|--------------------------|
| pEM393 | Psicheck II<br>(Promega) | Death cassette | Psicheck II |  |  |  |  |  | pDEST 14<br>(Invitrogen) |
|--------|--------------------------|----------------|-------------|--|--|--|--|--|--------------------------|

|        |                       |                |                                                                     |  |  |  |  |  |                       |
|--------|-----------------------|----------------|---------------------------------------------------------------------|--|--|--|--|--|-----------------------|
| pEM394 | Psicheck II (Promega) | Death cassette | and PCR product were                                                |  |  |  |  |  | pDEST 14 (Invitrogen) |
| pEM395 | Psicheck II (Promega) | Death cassette | digested with XbaI or                                               |  |  |  |  |  | pDEST 14 (Invitrogen) |
| pEM396 | Psicheck II (Promega) | Death cassette | XhoI. Death cassette was inserted into the Firefly or Renilla 3'UTR |  |  |  |  |  | pDEST 14 (Invitrogen) |

## Luciferase 3'UTRs

|                  |        |                          |     |          |          |     |   |                |
|------------------|--------|--------------------------|-----|----------|----------|-----|---|----------------|
| pEM393 cdh-3     | pEM393 | cdh-3 3'UTR WT Gateway®  | 419 | 7740905  | 7741323  | III | - | N2 genomic DNA |
| pEM393 egl-5     | pEM393 | egl-5 3'UTR WT Gateway®  | 780 | 7816270  | 7817049  | III | + | N2 genomic DNA |
| pEM393 lin-17    | pEM393 | lin-17 3'UTR WT Gateway® | 230 | 2717357  | 2717586  | I   | + | N2 genomic DNA |
| pEM393 pac-1     | pEM393 | pac-1 3'UTR WT Gateway®  | 478 | 8518318  | 8518795  | III | + | N2 genomic DNA |
| pEM393 ptr-3     | pEM393 | ptr-3 3'UTR WT Gateway®  | 960 | 361678   | 362637   | II  | - | N2 genomic DNA |
| pEM393 ptr-6     | pEM393 | ptr-6 3'UTR WT Gateway®  | 702 | 5241842  | 5242543  | II  | - | N2 genomic DNA |
| pEM393 ptr-8     | pEM393 | ptr-8 3'UTR WT Gateway®  | 598 | 10893081 | 10893678 | II  | + | N2 genomic DNA |
| pEM393 ptr-18    | pEM393 | ptr-18 3'UTR WT Gateway® | 548 | 12977803 | 12978350 | II  | + | N2 genomic DNA |
| pEM393 ptr-20    | pEM393 | ptr-20 3'UTR WT Gateway® | 480 | 15163375 | 15163854 | II  | + | N2 genomic DNA |
| pEM393 vang-1    | pEM393 | vang-1 3'UTR WT Gateway® | 300 | 2890296  | 2890595  | X   | + | N2 genomic DNA |
| pEM394 cdh-3 inv | pEM394 | cdh-3 3'UTR WT Gateway®  | 419 | 7740905  | 7741323  | III | - | N2 genomic DNA |

---
