# Supplementary material for: The Conserved miR-51 microRNA Family Is Redundantly Required for Embryonic Development and Pharynx Attachment in Caenorhabditis elegans
Source: Oxford University Press journal article supplement (doi:10.1534/genetics.110.117515), 2010-04-27
Supplement: figures1.pdf [file figures1.pdf]

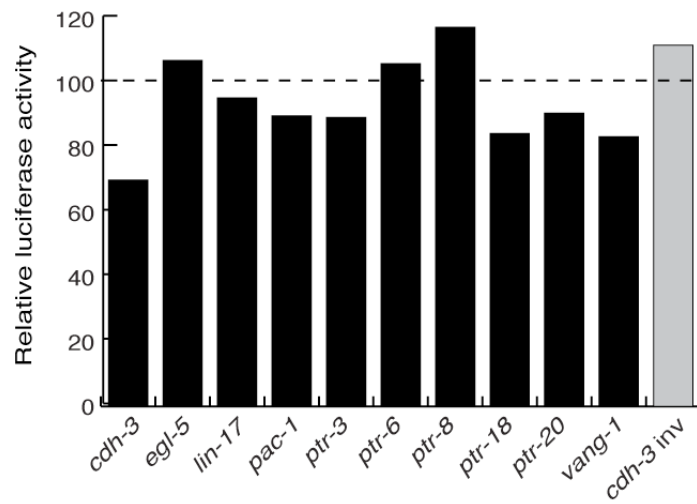

FIGURE S1.—miR-52 can regulate the *cdh-3* 3'UTR in mammalian cells. Luciferase reporter assay. Full length 3'UTRs of predicted miR-51 family target genes were cloned into a modified psiCHECK-2 dual luciferase assay vector (Promega) and transfected into HeLa cells (see Materials and Methods). Luciferase activity shown is relative to transfection of a miR-52 mimic as compared to a control miRNA mimic. Experiments were done in triplicates. *cdh-3 inv*, antisense *cdh-3* 3'UTR.
