# Supplementary material for: The Conserved miR-51 microRNA Family Is Redundantly Required for Embryonic Development and Pharynx Attachment in Caenorhabditis elegans
Source: Oxford University Press journal article supplement (doi:10.1534/genetics.110.117515), 2010-04-27
Supplement: figures2.pdf [file figures2.pdf]

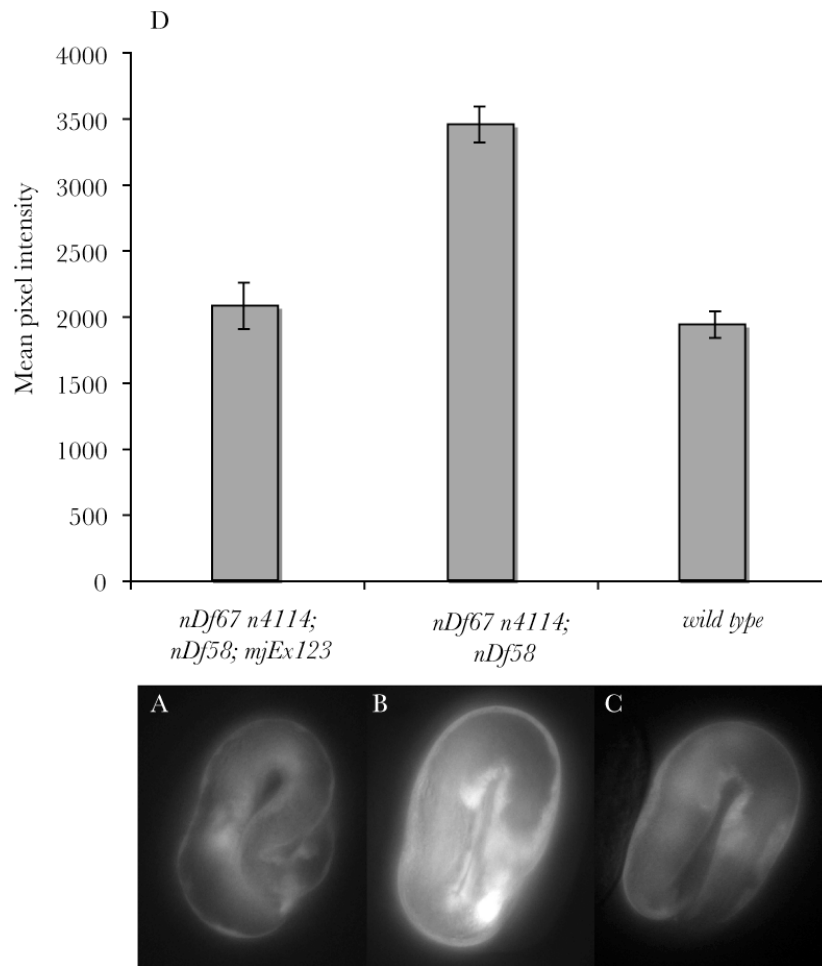

FIGURE S2.—Endogenous levels of miR-51 family miRNAs are able to regulate a sensor transgene containing *cdh-3* 3'UTR sequences. (A-C) GFP was expressed under the *col-10* promoter and the *cdh-3* wild-type 3'UTR. The transgene was expressed at a lower level in the presence of a miR-52-expressing rescue array (A) or in the wild-type background (C) than in the absence of any miR-51 family miRNAs (B). D) Quantification of mean pixel intensity in >30 animals. Bars represent the standard error of the mean.
