# Supplementary material for: The Conserved miR-51 microRNA Family Is Redundantly Required for Embryonic Development and Pharynx Attachment in Caenorhabditis elegans
Source: Oxford University Press journal article supplement (doi:10.1534/genetics.110.117515), 2010-04-27
Supplement: figures3.pdf [file figures3.pdf]

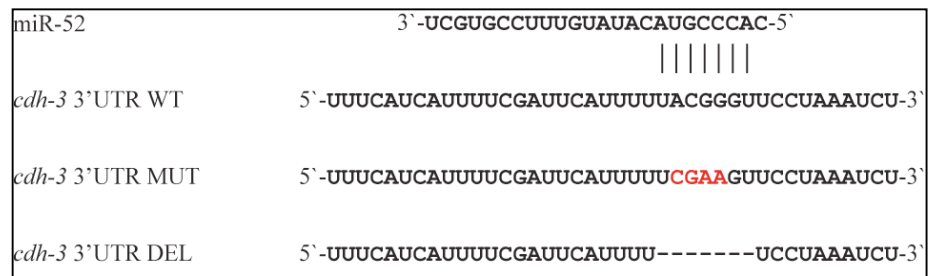

FIGURE S3.—Mutations introduced into the full-length 3'UTR of *cdh-3*. 40 base pairs of the 3'UTR of *cdh-3* encompassing the predicted miR-52 target site is shown. Mutations introduced into the 3'UTR should abolish either some (MUT) or all (DEL) base pairing between the miRNA seed and the 3'UTR.
