# Supplementary material for: The Conserved miR-51 microRNA Family Is Redundantly Required for Embryonic Development and Pharynx Attachment in Caenorhabditis elegans
Source: Oxford University Press journal article supplement (doi:10.1534/genetics.110.117515), 2010-04-27
Supplement: figures4.pdf [file figures4.pdf]

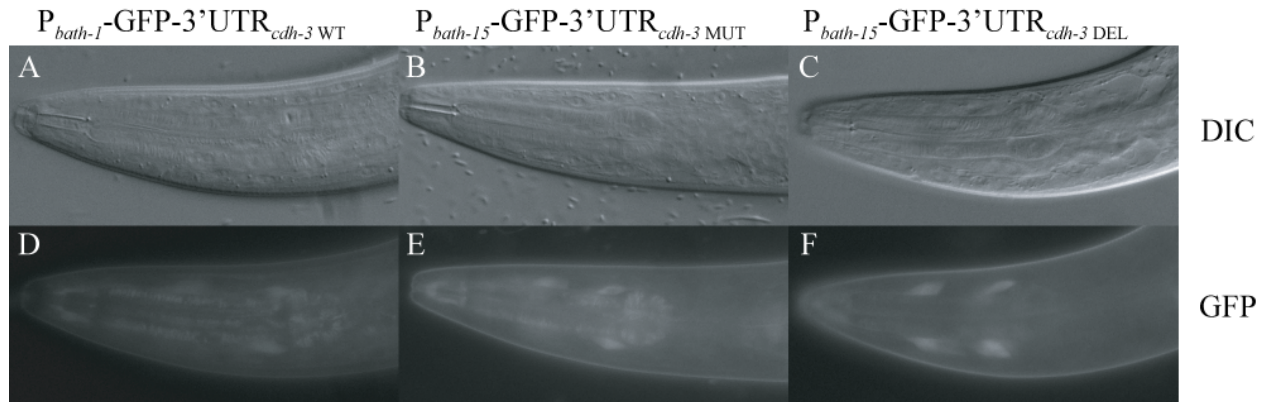

FIGURE S4.—Regulation of GFP::CDH-3 levels in the arcade cells requires the miR-51 family binding site. GFP was expressed under the *bath-15* promoter in the arcade cells (D-F) and compared between constructs with a *cdh-3* 3'UTR that was either wild-type (WT) (A,D), MUT (B,E) or DEL (C-F). For molecular identities of *cdh-3* 3'UTR mutations refer to Fig. S3. Larvae were imaged at the L4 stage.
