# Supplementary material for: The Conserved miR-51 microRNA Family Is Redundantly Required for Embryonic Development and Pharynx Attachment in Caenorhabditis elegans
Source: Oxford University Press journal article supplement (doi:10.1534/genetics.110.117515), 2010-04-27
Supplement: figures5.pdf [file figures5.pdf]

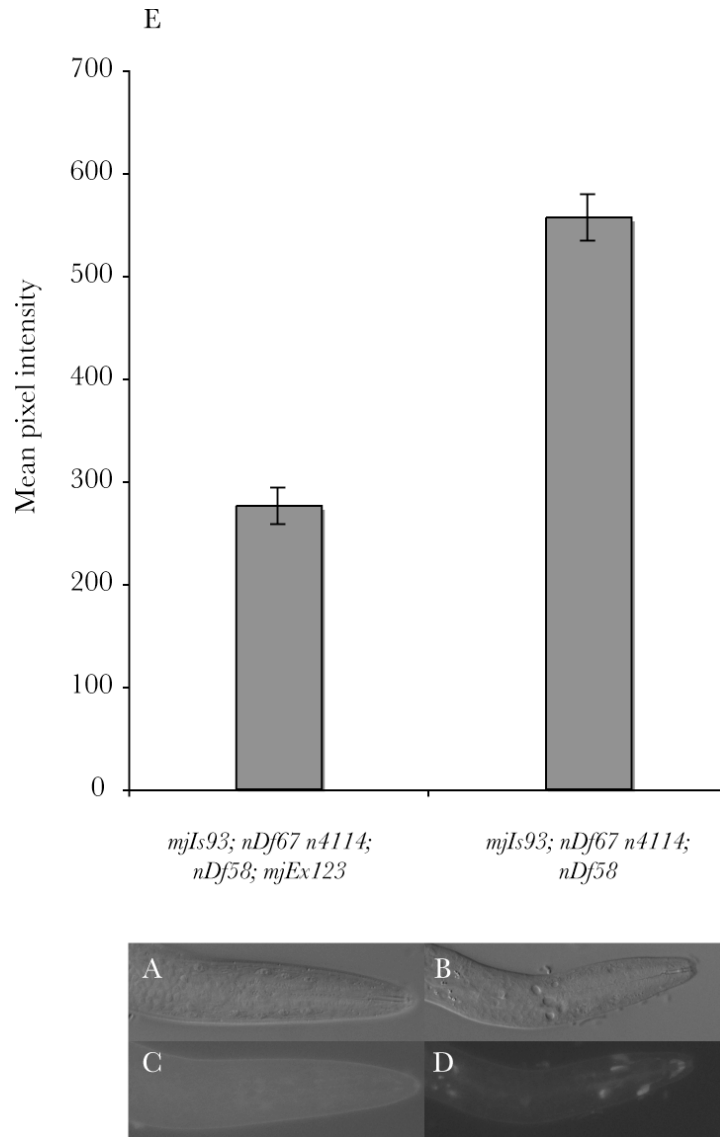

FIGURE S5.—An arcade driven reporter is upregulated in *mir-51* family mutants. (A-D) In a single copy transgene *mjIs93* GFP is expressed in the arcade cells under the *bath-15* promoter from the L1 stage. The majority of *mir-51* family mutant embryos are Pun and do not express this marker prior to their death (Fig. 2). A minority of *mir-51* family mutant embryos are not Pun (B) and do express this arcade marker. GFP under the control of the wild-type *cdh-3* 3'UTR is overexpressed in non-Pun *mir-51* family mutant embryos (D) as compared to non-Pun rescued embryos (C). (E) Mean pixel intensities of the visible arcade cell bodies were determined in 10 animals. Where arcade cell bodies were not visible, pixel intensity was measured between the mouth and the anterior pharyngeal bulb in a position consistent with the arcade cell body position (i.e. outside the pharyngeal basement membrane) at least 3 times per animal. Background fluorescence of the slide was subtracted. Error bars represent standard error of the mean.
