# Supplementary material for: The Conserved miR-51 microRNA Family Is Redundantly Required for Embryonic Development and Pharynx Attachment in Caenorhabditis elegans
Source: Oxford University Press journal article supplement (doi:10.1534/genetics.110.117515), 2010-04-27
Supplement: figures6.pdf [file figures6.pdf]

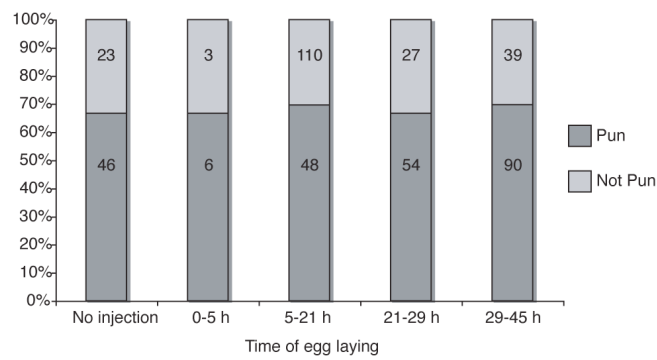

FIGURE S6.—Microinjection of dsRNA against *cdh-3* does not suppress the unattached pharynx (Pun) phenotype. Eight microinjected LA *nDf67 n4114; nDf58; mjEx123* animals were allowed to lay progeny for the indicated time periods. Progeny lacking the *mjEx123* rescuing transgene were identified through the lack of DLG-1::mCHERRY expression and were scored for a Pun phenotype 24 hrs later. No difference was observed in the frequency of Pun phenotype.
