# Supplementary material for: The Conserved miR-51 microRNA Family Is Redundantly Required for Embryonic Development and Pharynx Attachment in Caenorhabditis elegans
Source: Oxford University Press journal article supplement (doi:10.1534/genetics.110.117515), 2010-04-27
Supplement: tables1.pdf [file tables1.pdf]

**TABLE S1**  
**Strains used in this study**

| Strain | Genotype                                                                                                                                                   |
|--------|------------------------------------------------------------------------------------------------------------------------------------------------------------|
| N2     | +                                                                                                                                                          |
| SX511  | <i>mir-51(n4473) IV</i>                                                                                                                                    |
| SX512  | <i>mir-52(n4114) IV</i>                                                                                                                                    |
| SX510  | <i>mir-52(n4100) IV</i>                                                                                                                                    |
| SX513  | <i>mir-53(n4113) IV</i>                                                                                                                                    |
| SX514  | <i>mir-54 mir-55 mir-56(nDf58) X</i>                                                                                                                       |
| SX515  | <i>mir-51 mir-53(nDf67) IV</i>                                                                                                                             |
| SX138  | <i>mir-51(n4473) mir-52(n4114) IV</i>                                                                                                                      |
| SX16   | <i>mir-53(n4113) mir-52(n4100) IV</i>                                                                                                                      |
| SX516  | <i>mir-53(n4113) mir-52(n4114) IV</i>                                                                                                                      |
| SX517  | <i>mir-51 mir-53(nDf67) mir-52 (n4114) IV</i>                                                                                                              |
| SX48   | <i>mir-51(n4473) IV; mir-54 mir-55 mir-56(nDf58) X</i>                                                                                                     |
| SX96   | <i>mir-52(n4114) IV; mir-54 mir-55 mir-56(nDf58) X</i>                                                                                                     |
| SX27   | <i>mir-53(n4113) IV; mir-54 mir-55 mir-56(nDf58) X</i>                                                                                                     |
| SX625  | <i>mir-51 mir-53(nDf67) IV; mir-54 mir-55 mir-56(nDf58) X</i>                                                                                              |
| SX111  | <i>mir-53(n4113) mir-52(n4100) IV; mir-54 mir-55 mir-56(nDf58) X</i>                                                                                       |
| SX173  | <i>mir-51(n4473) mir-52(n4114)/ mir-51 (n4473) unc-26(e205) dpy-4(e1166) IV; mir-54 mir-55 mir-56 (nDf58) X</i>                                            |
| SX947  | <i>mir-51(n4473) mir-52(n4114) IV; mir-54 mir-55 mir-56(nDf58) X; mjEx123 (miR-52 rescue)</i><br>[miR-52 rescue contains $P_{alg-1}::DLG-1-MCHERRY$ ]      |
| SX123  | <i>mir-51 mir-53(nDf67) mir-52(n4114)/ mir-51 mir-53(nDf67) unc-26(e205) dpy-4(e1166) IV; mir-54 mir-55 mir-56 (nDf58) X</i>                               |
| SX356  | <i>mir-51 mir-53(nDf67) mir-52(n4114) IV; mir-54 mir-55 mir-56(nDf58) X; mjEx123 (miR-52 rescue)</i>                                                       |
| MT1642 | <i>lin-15AB(n765ts) X</i>                                                                                                                                  |
| SX860  | <i>lin-15AB(n765ts) X; mjIs60 (P<sub>mir-51</sub>-GFP, <i>lin-15B</i>(+))</i>                                                                              |
| SX615  | <i>mjIs39 (P<sub>mir-52</sub>-GFP, <i>lin-15B</i>(+))</i>                                                                                                  |
| SX509  | <i>mjIs37 (P<sub>mir-53</sub>-GFP, <i>lin-15B</i>(+))</i>                                                                                                  |
| SX59   | <i>lin-15AB(n765ts) X; mjEx12 (P<sub>mir-54-56</sub>-GFP, <i>lin-15B</i>(+))</i>                                                                           |
| EG4322 | <i>utT5605 II; unc-119(ed3)</i>                                                                                                                            |
| SX1003 | <i>mjIs93 II (P<sub>bath-15</sub>-GFP-3'UTR<sub>cdh-3</sub> WT, <i>cbr-unc-119</i>(+)); <i>unc-119(ed3) III</i></i>                                        |
| SX1005 | <i>mjIs95 II (P<sub>bath-15</sub>-GFP-3'UTR<sub>cdh-3</sub> WT, <i>cbr-unc-119</i>(+)); <i>unc-119(ed3) III</i></i>                                        |
| SX1007 | <i>mjIs97 II (P<sub>bath-15</sub>-GFP-3'UTR<sub>cdh-3</sub> MUT, <i>cbr-unc-119</i>(+)); <i>unc-119(ed3) III</i></i>                                       |
| SX1008 | <i>mjIs98 II (P<sub>bath-15</sub>-GFP-3'UTR<sub>cdh-3</sub> DEL, <i>cbr-unc-119</i>(+)); <i>unc-119(ed3) III</i></i>                                       |
| SX1009 | <i>mjIs99 II (P<sub>bath-15</sub>-GFP-3'UTR<sub>cdh-3</sub> DEL, <i>cbr-unc-119</i>(+)); <i>unc-119(ed3) III</i></i>                                       |
| SX669  | <i>mir-51 mir-53(nDf67) mir-52(n4114); mir-54 mir-55 mir-56(nDf58) X; mjEx123 (miR-52 rescue); pxIs10 (P<sub>pha-4</sub>-GFP-PM, <i>rol-6(su1006)</i>)</i> |

|        |                                                                                                                                                                                                                                         |
|--------|-----------------------------------------------------------------------------------------------------------------------------------------------------------------------------------------------------------------------------------------|
| SX1016 | <i>mir-51 mir-53(nDf67) mir-52(n4114); mir-54 mir-55 mir-56(nDf58) X; mjEx123</i> (miR-52 rescue); <i>mjEx288</i> (CDH-3(++))                                                                                                           |
| SX1017 | <i>mir-51 mir-53(nDf67) mir-52(n4114); mir-54 mir-55 mir-56(nDf58) X; mjEx123</i> (miR-52 rescue); <i>mjEx289</i> (CDH-3(++))                                                                                                           |
| SX1048 | <i>mjIs93 [P<sub>bath-15</sub>-GFP-3'UTR<sub>cdh-3</sub> WT, unc-119(+)] II ; mir-51 mir-53(nDf67) mir-52(n4114) IV; mir-54 mir-55 mir-56(nDf58) X ; mjEx123</i> (miR-52 rescue)                                                        |
| SX596  | <i>mir-51 mir-53(nDf67) mir-52(n4114); mir-54 mir-55 mir-56(nDf58) X; mjEx123</i> (miR-52 rescue); <i>mjEx177</i> (P <sub>col-10</sub> -GFP-3'UTR <sub>cdh-3</sub> WT, P <sub>myo-2</sub> -MCHERRY-3'UTR <sub>unc-54</sub> )            |
| SX597  | <i>mir-51 mir-53(nDf67) mir-52(n4114); mir-54 mir-55 mir-56(nDf58) X; mjEx123</i> (miR-52 rescue); <i>mjEx178</i> (P <sub>col-10</sub> -GFP-3'UTR <sub>cdh-3</sub> WT, P <sub>myo-2</sub> -MCHERRY-3'UTR <sub>unc-54</sub> )            |
| SX598  | <i>mir-51 mir-53(nDf67) mir-52(n4114); mir-54 mir-55 mir-56(nDf58) X; mjEx123</i> (miR-52 rescue); <i>mjEx179</i> (P <sub>col-10</sub> -GFP-3'UTR <sub>cdh-3</sub> WT, P <sub>myo-2</sub> -MCHERRY-3'UTR <sub>unc-54</sub> )            |
| SX689  | <i>mir-51 mir-53(nDf67) mir-52(n4114); mir-54 mir-55 mir-56(nDf58) X; mjEx123</i> (miR-52 rescue); <i>mjEx187</i> (P <sub>col-10</sub> -GFP-3'UTR <sub>cdh-3</sub> MUT, P <sub>myo-2</sub> -MCHERRY-3'UTR <sub>unc-54</sub> )           |
| SX690  | <i>mir-51 mir-53(nDf67) mir-52(n4114); mir-54 mir-55 mir-56(nDf58) X; mjEx123</i> (miR-52 rescue); <i>mjEx188</i> (P <sub>col-10</sub> -GFP-3'UTR <sub>cdh-3</sub> MUT, P <sub>myo-2</sub> -MCHERRY-3'UTR <sub>unc-54</sub> )           |
| SX691  | <i>mir-51 mir-53(nDf67) mir-52(n4114); mir-54 mir-55 mir-56(nDf58) X; mjEx123</i> (miR-52 rescue); <i>mjEx189</i> (P <sub>col-10</sub> -GFP-3'UTR <sub>cdh-3</sub> MUT, P <sub>myo-2</sub> -MCHERRY-3'UTR <sub>unc-54</sub> )           |
| SX692  | <i>mir-51 mir-53(nDf67) mir-52(n4114); mir-54 mir-55 mir-56(nDf58) X; mjEx123</i> (miR-52 rescue); <i>mjEx190</i> (P <sub>col-10</sub> -GFP-3'UTR <sub>cdh-3</sub> MUT, P <sub>myo-2</sub> -MCHERRY-3'UTR <sub>unc-54</sub> )           |
| SX693  | <i>mir-51 mir-53(nDf67) mir-52(n4114); mir-54 mir-55 mir-56(nDf58) X; mjEx123</i> (miR-52 rescue); <i>mjEx191</i> (P <sub>col-10</sub> -GFP-3'UTR <sub>cdh-3</sub> MUT, P <sub>myo-2</sub> -MCHERRY-3'UTR <sub>unc-54</sub> )           |
| SX1117 | <i>mir-51 mir-53(nDf67) mir-52(n4114); mir-54 mir-55 mir-56(nDf58) X; mjEx123</i> (miR-52 rescue); <i>mjEx298</i> (P <sub>pha-4</sub> - <i>mir-52-3'UTR<sub>unc-54</sub></i> , P <sub>pha-4</sub> -HIS-58-GFP-3'UTR <sub>unc-54</sub> ) |
| SX1118 | <i>mir-51 mir-53(nDf67) mir-52(n4114); mir-54 mir-55 mir-56(nDf58) X; mjEx123</i> (miR-52 rescue); <i>mjEx299</i> (P <sub>pha-4</sub> - <i>mir-52-3'UTR<sub>unc-54</sub></i> , P <sub>pha-4</sub> -HIS-58-GFP-3'UTR <sub>unc-54</sub> ) |
| SX1119 | <i>mir-51 mir-53(nDf67) mir-52(n4114); mir-54 mir-55 mir-56(nDf58) X; mjEx123</i> (miR-52 rescue); <i>mjEx300</i> (P <sub>pha-4</sub> - <i>mir-52-3'UTR<sub>unc-54</sub></i> , P <sub>pha-4</sub> -HIS-58-GFP-3'UTR <sub>unc-54</sub> ) |
| SX1120 | <i>mir-51 mir-53(nDf67) mir-52(n4114); mir-54 mir-55 mir-56(nDf58) X; mjEx123</i> (miR-52 rescue); <i>mjEx301</i> (P <sub>pha-4</sub> - <i>mir-52-3'UTR<sub>unc-54</sub></i> , P <sub>pha-4</sub> -HIS-58-GFP-3'UTR <sub>unc-54</sub> ) |
| SX1121 | <i>mir-51 mir-53(nDf67) mir-52(n4114); mir-54 mir-55 mir-56(nDf58) X; mjEx123</i> (miR-52 rescue); <i>mjEx302</i> (P <sub>pha-4</sub> - <i>mir-52-3'UTR<sub>unc-54</sub></i> , P <sub>pha-4</sub> -HIS-58-GFP-3'UTR <sub>unc-54</sub> ) |
| SX704  | <i>mir-51 mir-53(nDf67) mir-52(n4114); mir-54 mir-55 mir-56(nDf58) X; mjEx123</i> (miR-52 rescue); <i>mjEx301</i> (P <sub>pha-4</sub> -HIS-58-GFP-3'UTR <sub>unc-54</sub> )                                                             |
| SX1284 | <i>mjEx178</i> (P <sub>col-10</sub> -GFP-3'UTR <sub>cdh-3</sub> WT, P <sub>myo-2</sub> -MCHERRY-3'UTR <sub>unc-54</sub> )                                                                                                               |
| SX1285 | <i>mjEx179</i> (P <sub>col-10</sub> -GFP-3'UTR <sub>cdh-3</sub> WT, P <sub>myo-2</sub> -MCHERRY-3'UTR <sub>unc-54</sub> )                                                                                                               |
