# Supplementary material for: The Conserved miR-51 microRNA Family Is Redundantly Required for Embryonic Development and Pharynx Attachment in Caenorhabditis elegans
Source: Oxford University Press journal article supplement (doi:10.1534/genetics.110.117515), 2010-04-27
Supplement: tables2.pdf [file tables2.pdf]

**TABLE S2****DNA constructs used in this study**

| Construct             | Vector      | Contents              | Cloning            | Size (bp) | Start    | End      | LG  | Strand | Template       |
|-----------------------|-------------|-----------------------|--------------------|-----------|----------|----------|-----|--------|----------------|
| miRNA reporters       |             |                       |                    |           |          |          |     |        |                |
| miR-51::GFP           | pPD95.79    | miR-51 promoter       | Sall/BamH1         | 1354      | 11026083 | 11027436 | IV  | -      | N2 genomic DNA |
| miR-52::GFP           | pPD95.79    | miR-52 promoter       | Sall/BamH1         | 2916      | 14031059 | 14033974 | IV  | +      | N2 genomic DNA |
| miR-53::GFP           | pPD95.79    | miR-53 promoter       | Sall/BamH1         | 767       | 11027662 | 11028428 | IV  | -      | N2 genomic DNA |
| miR-54-56::GFP        | pPD95.79    | miR-54-56 promoter    | Sall/HindIII       | 2889      | 13145016 | 13147904 | X   | -      | N2 genomic DNA |
| miRNA rescues         |             |                       |                    |           |          |          |     |        |                |
| miR-51 rescue         | TOPO pCR2.1 | miR-51 locus          | TA cloning         | 2011      | 11025613 | 11027623 | IV  | -      | N2 genomic DNA |
| miR-52 rescue         | TOPO pCR2.1 | miR-52 locus          | TA cloning         | 3337      | 14031848 | 14035184 | IV  | +      | N2 genomic DNA |
| miR-53 rescue         | TOPO pCR2.1 | miR-53 locus          | TA cloning         | 2211      | 11026342 | 11028552 | IV  | -      | N2 genomic DNA |
| miR-54-56 rescue      | TOPO pCR2.1 | miR-54-56 locus       | TA cloning         | 3697      | 13143492 | 13147188 | X   | -      | N2 genomic DNA |
| miR-52 (promoterless) |             | miR-52 locus fragment | MluI               | 172       | 14033952 | 14034123 | IV  | +      | N2 genomic DNA |
| Gateway® promoters    |             |                       |                    |           |          |          |     |        |                |
| Pbath-15              | pDONR P4P1R | bath-15 promoter      | Multisite Gateway® | 1126      | 7775944  | 7777069  | III | -      | N2 genomic DNA |
| Pcol-10               | pDONR P4P1R | col-10 promoter       | Multisite Gateway® | 1353      | 9165265  | 9166617  | V   | -      | N2 genomic DNA |
| Gateway® gene         |             |                       |                    |           |          |          |     |        |                |
| gfp                   | pDONR 221   | gfp                   | Multisite Gateway® | 1002      | 2        | 1003     |     |        | pPD95.75       |
| mir-52 (promoterless) | pDONR 221   | miR-52 locus          | Multisite Gateway® | 172       | 14033952 | 14034123 | IV  | +      | N2 genomic DNA |

## Gateway® 3'UTRs

|                    |                |                    |                       |      |         |         |     |   |                |
|--------------------|----------------|--------------------|-----------------------|------|---------|---------|-----|---|----------------|
| cdh-3 3'UTR WT     | pDONR<br>P2RP3 | cdh-3 3'UTR WT     | Multisite<br>Gateway® | 418  | 7740905 | 7741322 | III | - | WRM066aH<br>05 |
| cdh-3 3'UTR<br>MUT | pDONR<br>P2RP3 | cdh-3 3'UTR<br>MUT | Multisite<br>Gateway® | 419  | 7740905 | 7741323 | III | - | WRM066aH<br>05 |
| cdh-3 3'UTR DEL    | pDONR<br>P2RP3 | cdh-3 3'UTR<br>DEL | Multisite<br>Gateway® | 419  | 7740905 | 7741323 | III | - | WRM066aH<br>05 |
| unc-54 3'UTR       | pDONR<br>P2RP3 | unc-54 3'UTR       | Multisite<br>Gateway® | 1159 | 748     | 1906    |     |   | pPD95.75       |

Assembled  
constructs

|                                      |                            |                               |                                                                                                                                  |  |  |  |  |  |  |
|--------------------------------------|----------------------------|-------------------------------|----------------------------------------------------------------------------------------------------------------------------------|--|--|--|--|--|--|
| myo-2::<br>mcherry::unc-54<br>pGFP-N | pDEST R4-<br>R3<br>pJH4.52 | pha-4::HIS-58-<br>GFP::unc-54 | Multisite<br>Gateway®                                                                                                            |  |  |  |  |  |  |
| col-10::gfp::cdh-3<br>WT             | pDEST R4-<br>R3            |                               | Multisite<br>Gateway®                                                                                                            |  |  |  |  |  |  |
| col-10::gfp::cdh-3<br>MUT            | pDEST R4-<br>R3            |                               | Multisite<br>Gateway®                                                                                                            |  |  |  |  |  |  |
| bath-15::gfp::cdh-3<br>WT            | pDEST R4-<br>R3            |                               | Multisite<br>Gateway®                                                                                                            |  |  |  |  |  |  |
| bath-15::gfp::cdh-3<br>MUT           | pDEST R4-<br>R3            |                               | Multisite<br>Gateway®                                                                                                            |  |  |  |  |  |  |
| bath-15::gfp::cdh-3<br>DEL           | pDEST R4-<br>R3            |                               | Multisite<br>Gateway®                                                                                                            |  |  |  |  |  |  |
| pha-4::<br>mir-52::unc-54            | pJH4.52                    |                               | pGFP-N was<br>digested with<br>MluI and a<br>promoterless<br>mir-52<br>fragment was<br>inserted in<br>the correct<br>orientation |  |  |  |  |  |  |

## Luciferase assay

|        |                          |                |             |  |  |  |  |  |                          |
|--------|--------------------------|----------------|-------------|--|--|--|--|--|--------------------------|
| pEM393 | Psicheck II<br>(Promega) | Death cassette | Psicheck II |  |  |  |  |  | pDEST 14<br>(Invitrogen) |
|--------|--------------------------|----------------|-------------|--|--|--|--|--|--------------------------|

|        |                       |                |                                                                     |  |  |  |  |  |                       |
|--------|-----------------------|----------------|---------------------------------------------------------------------|--|--|--|--|--|-----------------------|
| pEM394 | Psicheck II (Promega) | Death cassette | and PCR product were                                                |  |  |  |  |  | pDEST 14 (Invitrogen) |
| pEM395 | Psicheck II (Promega) | Death cassette | digested with XbaI or                                               |  |  |  |  |  | pDEST 14 (Invitrogen) |
| pEM396 | Psicheck II (Promega) | Death cassette | XhoI. Death cassette was inserted into the Firefly or Renilla 3'UTR |  |  |  |  |  | pDEST 14 (Invitrogen) |

## Luciferase 3'UTRs

|                  |        |                          |     |          |          |     |   |                |
|------------------|--------|--------------------------|-----|----------|----------|-----|---|----------------|
| pEM393 cdh-3     | pEM393 | cdh-3 3'UTR WT Gateway®  | 419 | 7740905  | 7741323  | III | - | N2 genomic DNA |
| pEM393 egl-5     | pEM393 | egl-5 3'UTR WT Gateway®  | 780 | 7816270  | 7817049  | III | + | N2 genomic DNA |
| pEM393 lin-17    | pEM393 | lin-17 3'UTR WT Gateway® | 230 | 2717357  | 2717586  | I   | + | N2 genomic DNA |
| pEM393 pac-1     | pEM393 | pac-1 3'UTR WT Gateway®  | 478 | 8518318  | 8518795  | III | + | N2 genomic DNA |
| pEM393 ptr-3     | pEM393 | ptr-3 3'UTR WT Gateway®  | 960 | 361678   | 362637   | II  | - | N2 genomic DNA |
| pEM393 ptr-6     | pEM393 | ptr-6 3'UTR WT Gateway®  | 702 | 5241842  | 5242543  | II  | - | N2 genomic DNA |
| pEM393 ptr-8     | pEM393 | ptr-8 3'UTR WT Gateway®  | 598 | 10893081 | 10893678 | II  | + | N2 genomic DNA |
| pEM393 ptr-18    | pEM393 | ptr-18 3'UTR WT Gateway® | 548 | 12977803 | 12978350 | II  | + | N2 genomic DNA |
| pEM393 ptr-20    | pEM393 | ptr-20 3'UTR WT Gateway® | 480 | 15163375 | 15163854 | II  | + | N2 genomic DNA |
| pEM393 vang-1    | pEM393 | vang-1 3'UTR WT Gateway® | 300 | 2890296  | 2890595  | X   | + | N2 genomic DNA |
| pEM394 cdh-3 inv | pEM394 | cdh-3 3'UTR WT Gateway®  | 419 | 7740905  | 7741323  | III | - | N2 genomic DNA |

---
